# Supplementary material
Source: ML conference proceedings conference paper supplement (https://proceedings.neurips.cc/paper_files/paper/2016/hash/8232e119d8f59aa83050a741631803a6-Abstract.html)
Supplement: Supplementary file [file 8232e119d8f59aa83050a741631803a6-Supplemental.zip]

---

# Linear Feature Encoding for Reinforcement Learning Supplemental Materials

---

**Zhao Song, Ronald Parr<sup>†</sup>, Xuejun Liao, Lawrence Carin**  
 Department of Electrical and Computer Engineering  
<sup>†</sup> Department of Computer Science  
 Duke University, Durham, NC 27708, USA

## 1 Proof of Lemma 2

**Proof:** We start from the linear model solution and proceed as follows:

$$\begin{aligned}
 \mathbf{w} &= (I - \gamma P_{\Phi}^{\pi})^{-1} r_{\Phi} \\
 &= (I - \gamma(\Phi^T \Phi)^{-1} \Phi^T P^{\pi} \Phi)^{-1} (\Phi^T \Phi)^{-1} \Phi^T R \\
 &= (\Phi^T \Phi - \gamma \Phi^T P^{\pi} \Phi)^{-1} \Phi^T R = \mathbf{w}_{\Phi}^{\pi}.
 \end{aligned}$$

where the penultimate substitutes the definition of  $r_{\Phi}$  and  $P_{\Phi}^{\pi}$  in (3a) and (3b) of the main text, respectively.  $\square$

## 2 Proof of Theorem 3

**Proof:** The Bellman error in the context of linear value functions can be represented as

$$\text{BE}(\widehat{Q}^{\pi}(s, a)) = R(s, a) + \left[ \gamma \sum_{s', a'} P^{\pi}(s', a' | s, a) \Phi(s', a') \mathbf{w}_{\Phi}^{\pi} \right] - \Phi(s, a) \mathbf{w}_{\Phi}^{\pi} \quad (\text{A1})$$

We proceed to represent (A1) in its corresponding matrix form as

$$\text{BE}(\widehat{Q}^{\pi}) = R + \gamma P^{\pi} \Phi \mathbf{w}_{\Phi}^{\pi} - \Phi \mathbf{w}_{\Phi}^{\pi} \quad (\text{A2})$$

Plugging (5) of the main text into (A2), we have

$$\begin{aligned}
 \text{BE}(\widehat{Q}^{\pi}) &= R + \gamma P^{\pi} \Phi \mathbf{w}_{\Phi}^{\pi} - \Phi \mathbf{w}_{\Phi}^{\pi} \\
 &= (\Delta_R + \Phi r_{\Phi}) + \gamma(\Delta_{\Phi}^{\pi} + \Phi P_{\Phi}^{\pi}) \mathbf{w}_{\Phi}^{\pi} - \Phi \mathbf{w}_{\Phi}^{\pi} \\
 &= \Delta_R + \gamma \Delta_{\Phi}^{\pi} \mathbf{w}_{\Phi}^{\pi} + \Phi r_{\Phi} - \Phi (I - \gamma P_{\Phi}^{\pi}) \mathbf{w}_{\Phi}^{\pi} \\
 &= \Delta_R + \gamma \Delta_{\Phi}^{\pi} \mathbf{w}_{\Phi}^{\pi} + \Phi r_{\Phi} - \Phi (I - \gamma P_{\Phi}^{\pi}) \mathbf{w} \\
 &= \Delta_R + \gamma \Delta_{\Phi}^{\pi} \mathbf{w}_{\Phi}^{\pi}.
 \end{aligned}$$

The penultimate step follows from Lemma 2, and the last follows equation (4b) of the main text.  $\square$

## 3 Proof of Theorem 7

**Proof:** Equation (6) of the main text implies that there exist perfect linear predictors of the reward and the expected next state, given  $\Phi = AE_{\pi}$ . Specifically, we pick  $P_{\Phi}^{\pi} = D_{\pi}^s E_{\pi}$  and  $r_{\Phi} = D_{\pi}^r$ . Next, we have

$$\begin{aligned}
 \Delta_{\Phi}^{\pi} &= P^{\pi} \Phi - \Phi P_{\Phi}^{\pi} = P^{\pi} \Phi - AE_{\pi} D_{\pi}^s E_{\pi} \\
 &= P^{\pi} \Phi - P^{\pi} AE_{\pi} = P^{\pi} \Phi - P^{\pi} \Phi = 0
 \end{aligned}$$

and

$$\Delta_R = R - \Phi r_{\Phi} = R - AE_{\pi} D_{\pi}^r = R - R = 0$$

From Theorem 3, this implies zero Bellman error.  $\square$

#### 4 Proof of Theorem 8

**Proof:** Consider an MDP for which the  $Q$  and  $P^{\pi}$  are *not* linear in  $A$ . This would be the typical case in which one would wish to use a neural network or other non-linear approximation method.  $P^{\pi}$  can be deterministic so that  $P^{\pi}A$  is a matrix of raw encodings of actual states, not mixtures. Assume  $k = l$  and pick  $\mathcal{E} = P^{\pi}$ , i.e., pick a vacuous encoder. (For this example we will ignore the reward because predicting the reward does not change anything.) This implies a vacuous decoder  $D = I$ . When combined, these predict  $P^{\pi}A$ . However,  $Q$  is not linear in  $A$  by assumption and therefore is not linear in  $\Phi = \mathcal{E}(A)$  since elements of  $\mathcal{E}(A)$  are also elements of  $A$ . Therefore, a linear value function using features  $\mathcal{E}(A)$  may have nonzero Bellman error.  $\square$

#### 5 Additional Results

After learning a policy  $\pi$ , we can evaluate  $V_{\pi}$  exactly since there are just 203 states. Subsequently, we have

$$\text{Actual return} = \sum_s V_{\pi}(s) b_0(s),$$

where  $b_0$  corresponds to a uniform distribution. Figure A1 shows the actual returns for different algorithms, where the “optimal” curve is obtained by solving the MDP.

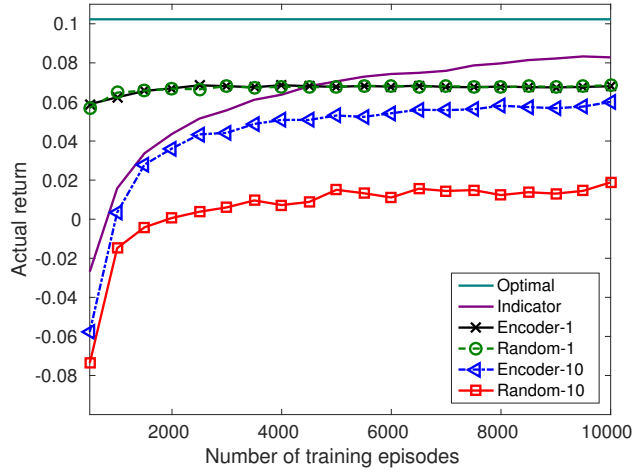

Figure A1: Actual return as a function of the number of training episodes, in the Blackjack problem.
